# Supplementary material for: Three in one sensor: a fluorometric, colorimetric and paper based probe for the selective detection of mercury(ii)
Source: Royal Society of Chemistry journal article supplement (doi:10.1039/d1nj00085c), 2021-01-01
Supplement: d1nj00085c1.pdf [file d1nj00085c1.pdf]

## SUPPLEMENTARY MATERIAL

### Three in One Sensor: A Fluorescent, Colorimetric and Paper Based Probe for Selective Detection of Mercury (II)

Emine Gul CANSU ERGUN \*

<sup>a</sup> Department of Electrical and Electronics Engineering, Baskent University, TR-06810 Ankara,  
Turkey.

\*Corresponding author:

Tel.: +903122466666/1413; E-mail: egulcansu@baskent.edu.tr

## NEW JOURNAL OF CHEMISTRY

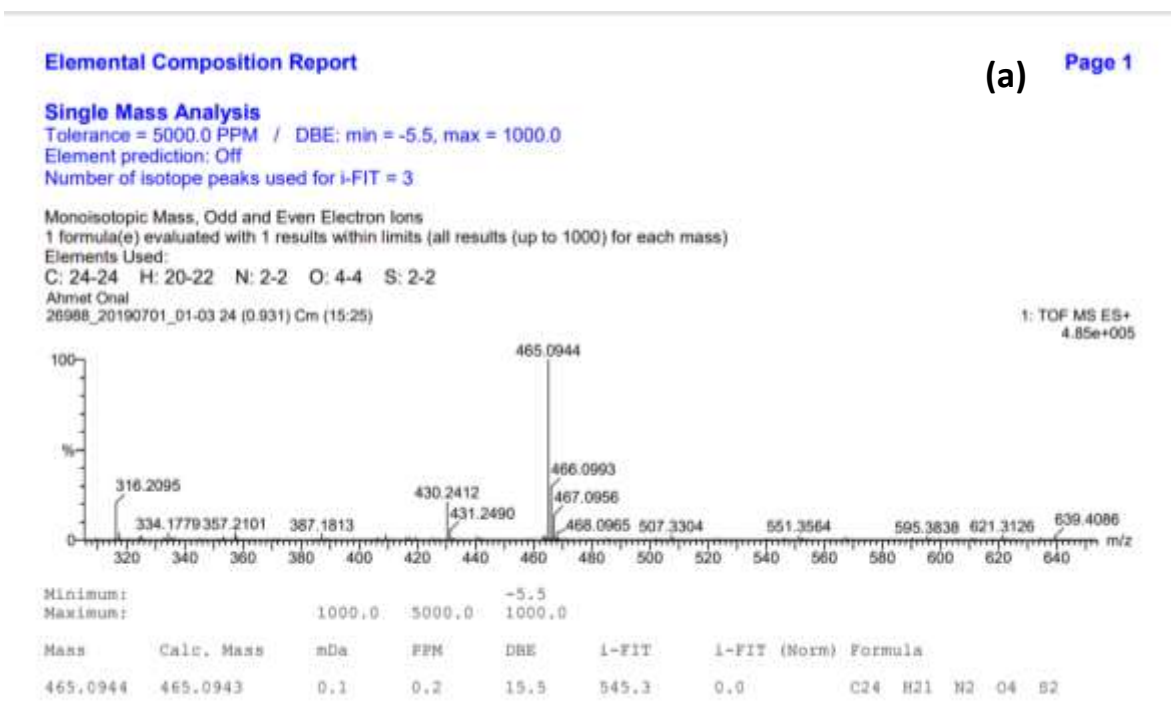

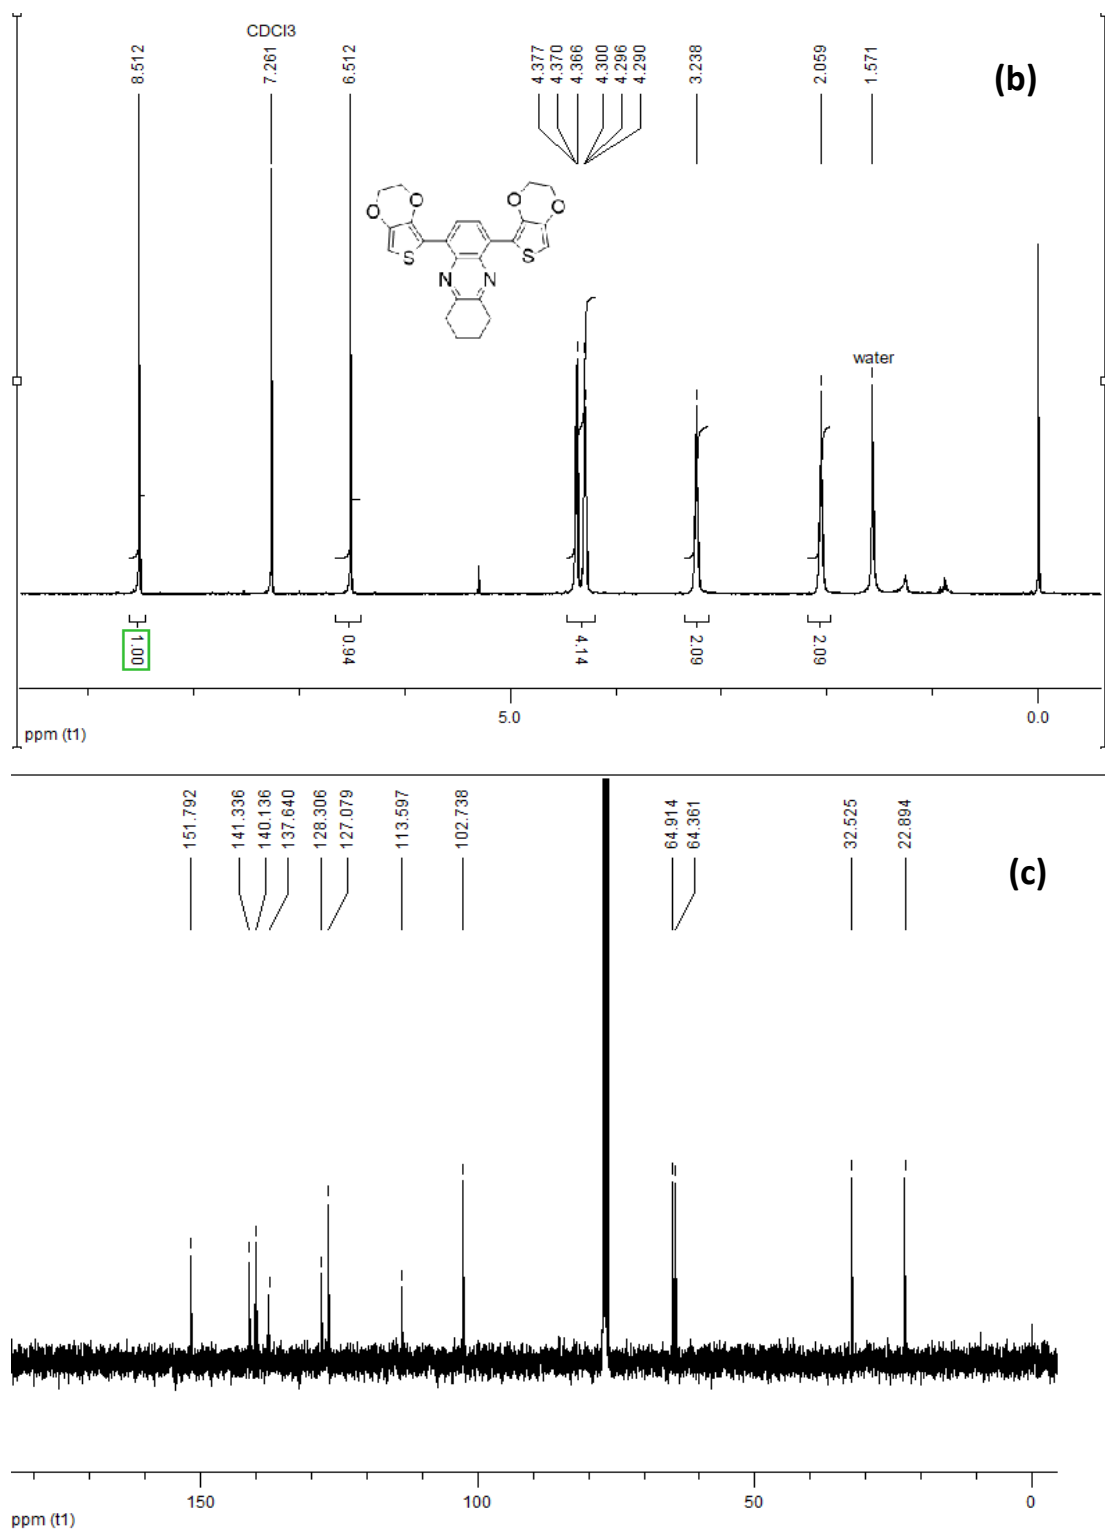

Figure S1. a) HRMS spectrum, b) <sup>1</sup>H-NMR spectrum, and c) <sup>13</sup>C-NMR spectrum of the sensor molecule.

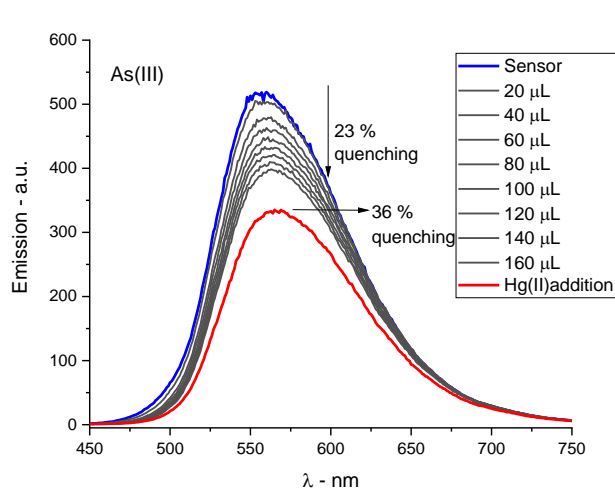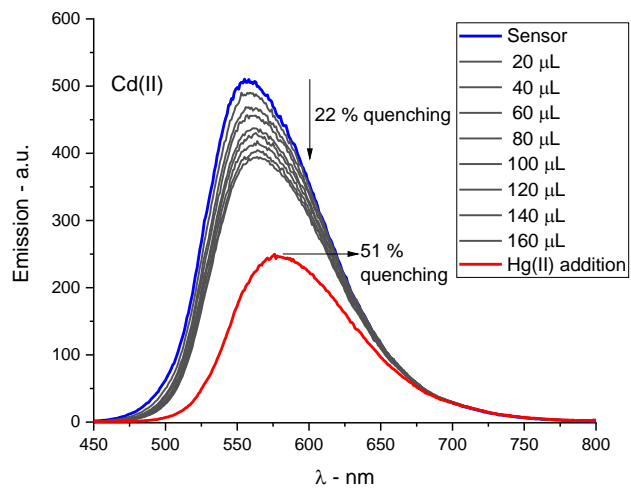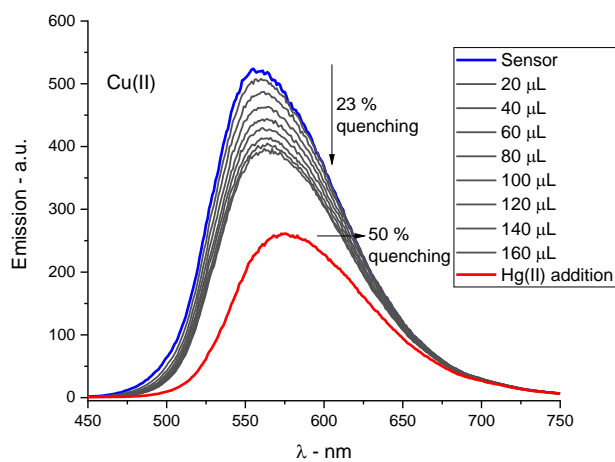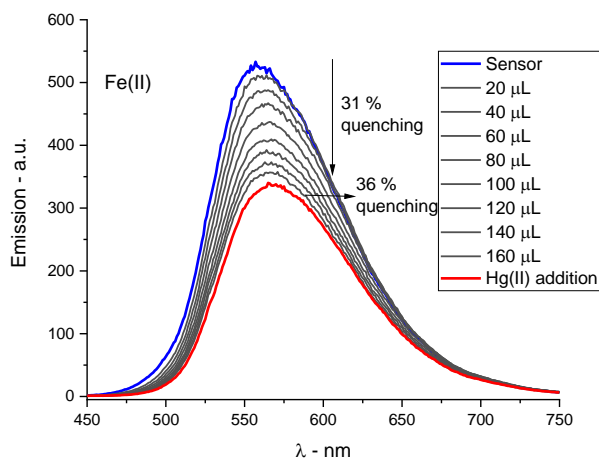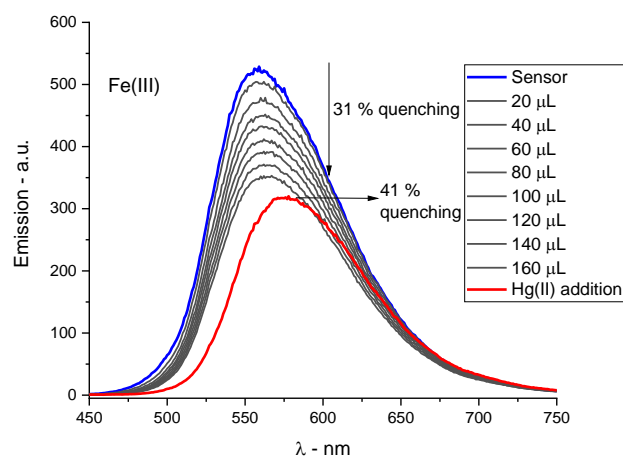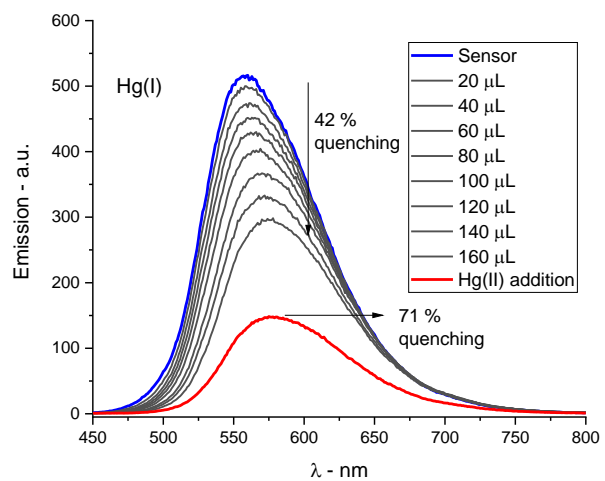

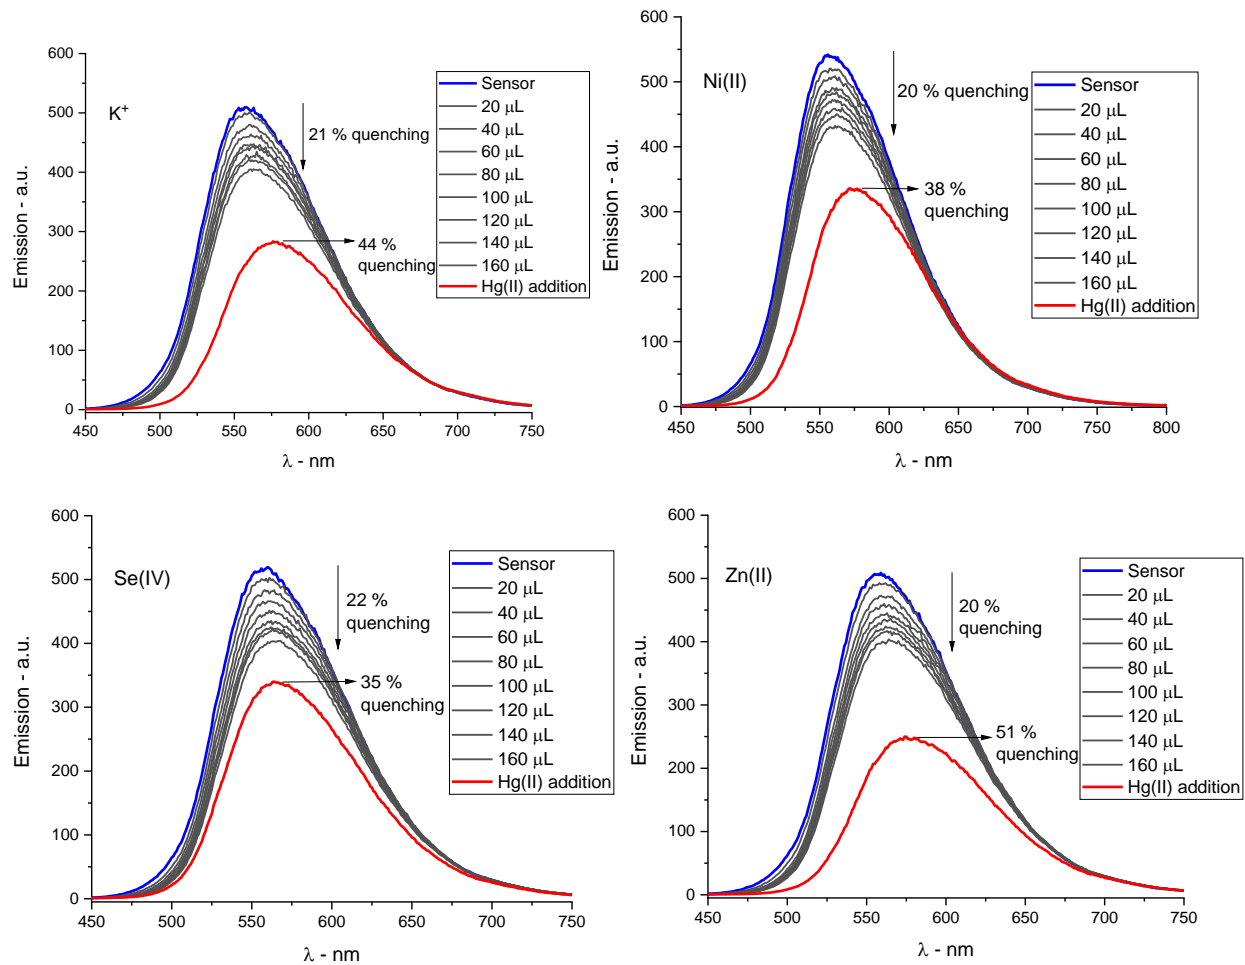

Figure S2. Change in the percent quenching amounts in the emission maximum of the sensor upon stepwise additions of 20-40-60-80-100-120-140 and 160  $\mu\text{L}$  (0.17, 0.33, 0.51, 0.67, 0.83, 1.00, 1.17 and 1.33 mol equivalents) for each ion, ( $\text{As}^{3+}$ ,  $\text{Cd}^{2+}$ ,  $\text{Cu}^{2+}$ ,  $\text{Fe}^{2+}$ ,  $\text{Fe}^{3+}$ ,  $\text{Hg}^+$ ,  $\text{K}^+$ ,  $\text{Ni}^{2+}$ ,  $\text{Se}^{4+}$  and  $\text{Zn}^{2+}$ ), and the obtained additional quenching in the emission spectra upon addition of 0.6 eq.  $\text{Hg}^{2+}$ .

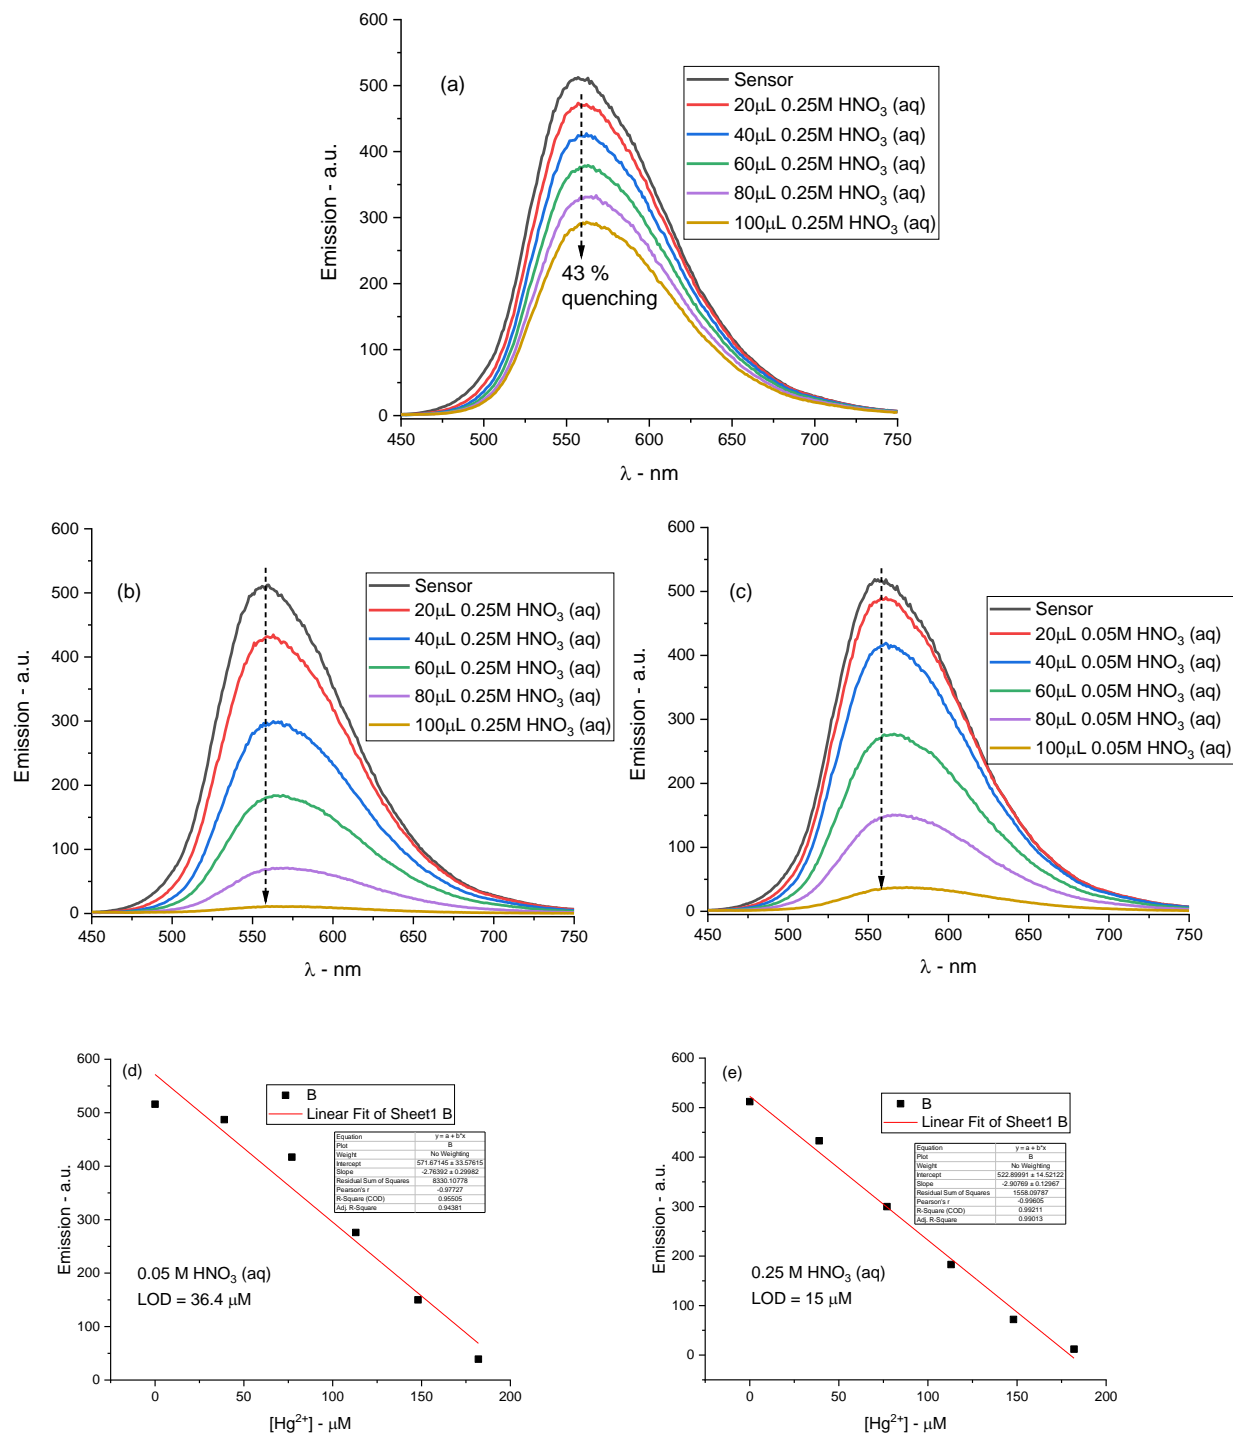

Figure S3. a) Emission spectra collected during the titration of 0.24 M sensor with 0.25 M HNO<sub>3</sub> (aq), b) Emission spectra collected during the titration of 0.24 M sensor with Hg<sup>2+</sup> in 0.25 M HNO<sub>3</sub> (aq), c) Emission spectra collected during the titration of 0.24 M sensor with Hg<sup>2+</sup> in 0.05 M HNO<sub>3</sub> (aq), d) Linear fitting analysis using data in (c), d) Linear fitting analysis using data in (b).

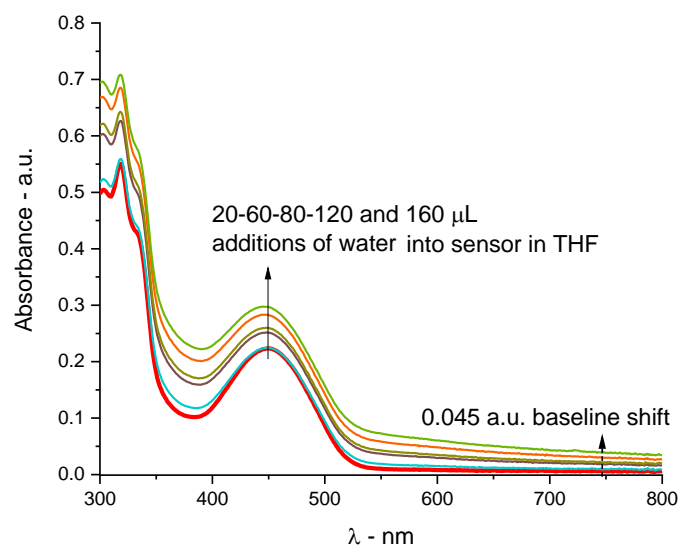

Figure S4. The control experiment for UV-Vis titration of the 0.24 mM sensor with deionized water.

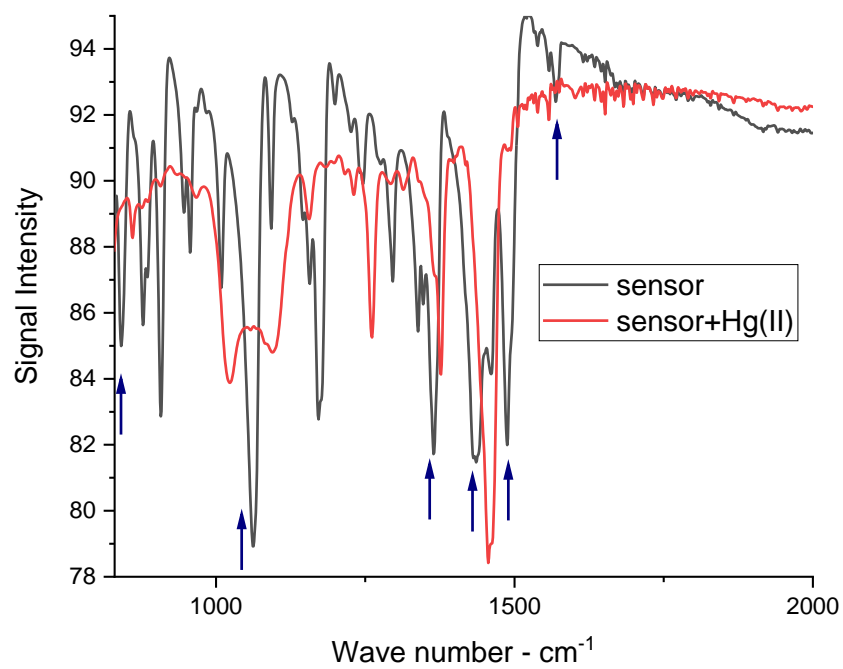

Figure S5. FTIR spectrum of sensor before (black) and after (red) addition of  $\text{Hg}^{2+}$ .

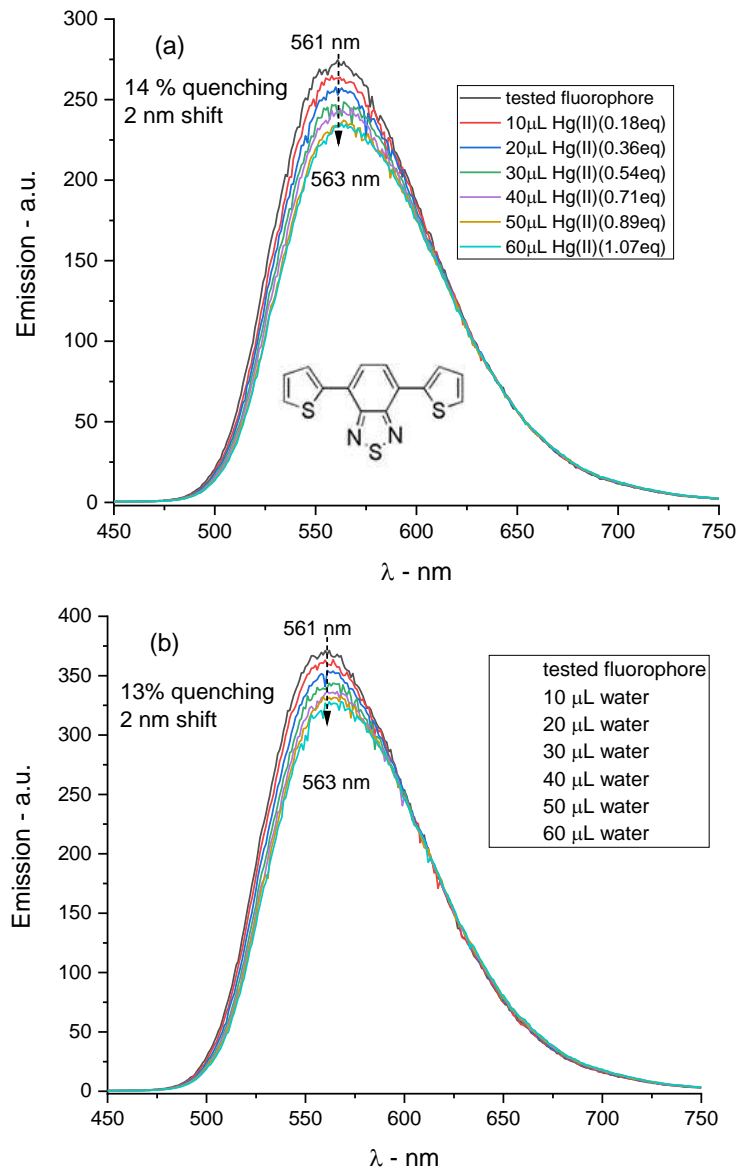

Figure S6. Emission spectra collected during the titration of tested fluorophore with 10 mM  $\text{Hg}^{2+}$ , b) Emission spectra collected during the titration of tested fluorophore with water (control experiment). Inset of a: Chemical structure of the tested fluorophore.
